# Supplementary material for: AutoClickChem: Click Chemistry in Silico
Source: PubMed Central journal article supplement (PMC3305364; doi:10.1371/journal.pcbi.1002397), 2012-03-15

## Cycloadditions of Unsaturated Species

### 1,3-dipolar cycloaddition reactions

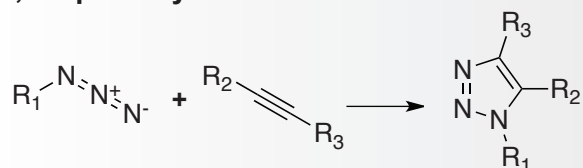

## Nucleophilic substitution chemistry

### Epoxide ring-opening reactions

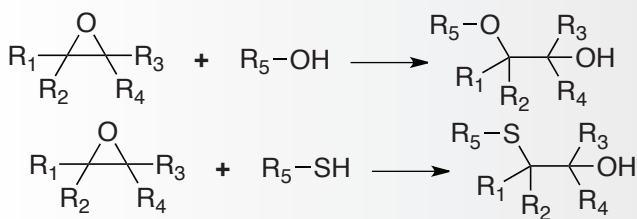

## Carbonyl chemistry of the "non-aldol" type

### Chloroformate + amine

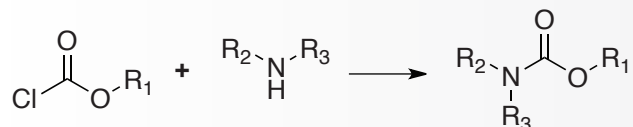

### Sulfonyl Azide + Thio Acid

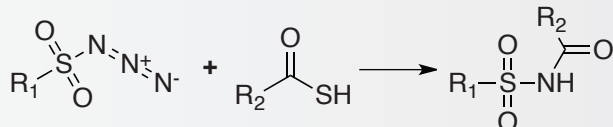

### Esterification, thioesterification, and transesterification

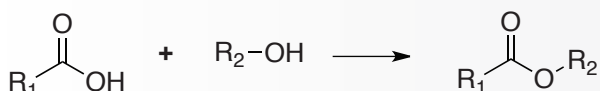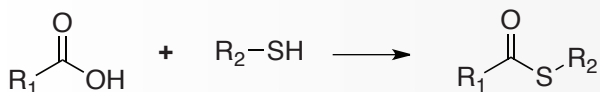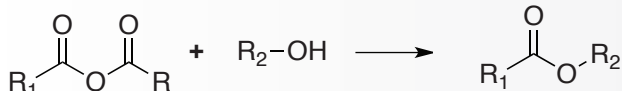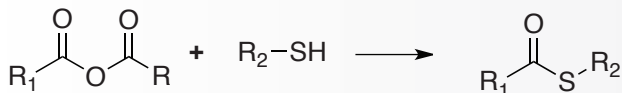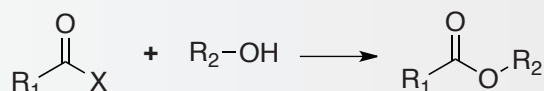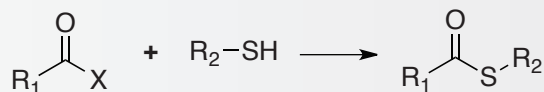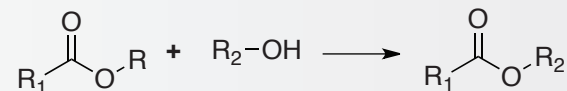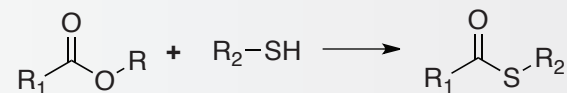

### Amidification

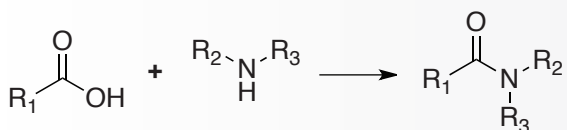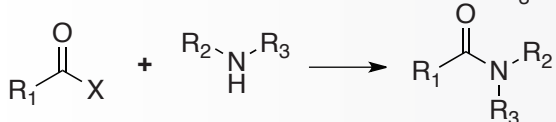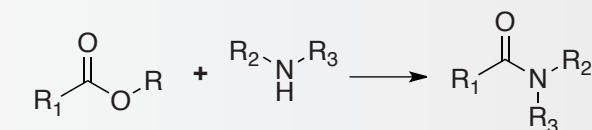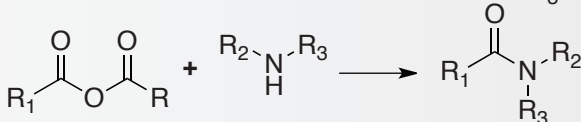

### Urea and thiourea formation

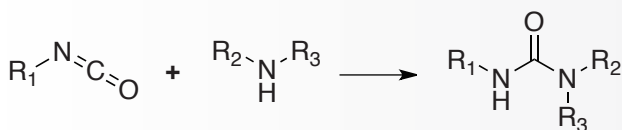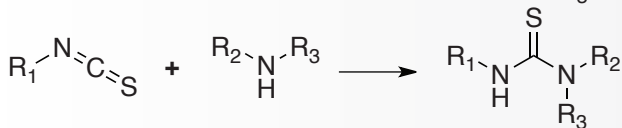

### Carbamate, carbamothioate, and carbamodithioate formation

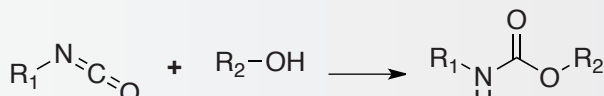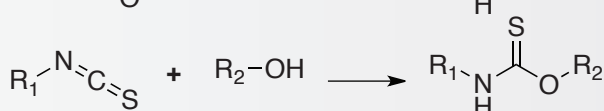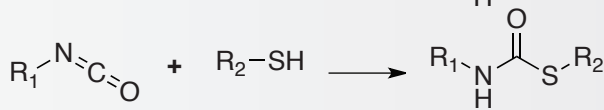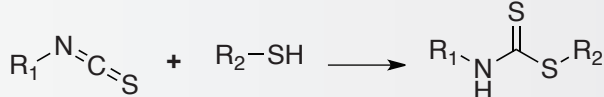

Supplement: pcbi.1002397.s001.pdf [file pcbi.1002397.s001.pdf]
